# Supplementary material for: One Species, Hundreds of Subspecies? New Insight into the Intraspecific Classification of the Old World Swallowtail (Papilio machaon Linnaeus, 1758) Based on Two Mitochondrial DNA Markers
Source: MDPI journal article supplement (doi:10.3390/insects13080752), 2022-08-21
Supplement: s1 [file s1]

Table S2. The summary of specimens used in this study, and their relations to different subspecies and haplotypes.

| Country    | Locality                                                              | Specimen no. and type  | Year | n | Subspecies               |                          |                         | Haplotype symbol |                         |
|------------|-----------------------------------------------------------------------|------------------------|------|---|--------------------------|--------------------------|-------------------------|------------------|-------------------------|
|            |                                                                       |                        |      |   | Eller (1936)             | Seyer*                   | Sturm (2017)            | 16S rDNA         | Cytb                    |
| Armenia    | Zangezur range, Vahravar vill.                                        | 67 (D), 68 (D)         | 2010 | 2 | ssp. <i>syriacus</i>     | ssp. <i>syriacus</i>     | ssp. <i>machaon</i>     | Hap 10           | Hap 3<br>Hap 4          |
| China      | Gansu prov., Zhangye, 2600 mts.                                       | 8 (D), 9 (D), 16 (D)   | 2014 | 3 | "sikkimensis gruppe"     | ssp. <i>chinensis</i>    | ssp. <i>venchuanus</i>  | Hap 1<br>Hap 3   | Hap 3<br>Hap 4<br>Hap 8 |
|            | Gansu prov., Xiahe country, 2500 mts.                                 | 80 (D), 81 (D)         | 2018 | 2 | "sikkimensis gruppe"     | ssp. <i>montanus</i>     | ssp. <i>alpherakyi</i>  | Hap 18           | Hap 24<br>Hap 26        |
|            | Guangxi prov., Lingui District, Guilin city,                          | 6 (D), 7 (D)           | 2014 | 2 | "schantugensis gruppe"   | ssp. <i>chinensis</i>    | ssp. <i>venchuanus</i>  | Hap 1<br>Hap 2   | Hap 5                   |
|            | Sichuan prov., Batang, 2600 mts.                                      | 83 (D)                 | 2018 | 1 | "schantugensis gruppe"   | ssp. <i>archias</i>      | ssp. <i>verity</i>      | Hap 20           | Hap 28                  |
|            | Tibet prov., Xigaze area, N. Kangmar, 5000 mts.                       | 86 (D)                 | 2018 | 1 | "sikkimensis gruppe"     | ssp. <i>sikkimensis</i>  | ssp. <i>everestii</i>   | Hap 21           | Hap 31                  |
|            | Tibet prov., Xigaze area, S from Saga city, 5000 mts.                 | 85 (D)                 | 2018 | 1 | "sikkimensis gruppe"     | ssp. <i>asiaticae</i>    | ssp. <i>everestii</i>   | Hap 21           | Hap 30                  |
|            | Qinghai prov., Dulan county, Xiariha town, 4000 mts.                  | 77 (D)                 | 2018 | 1 | "sikkimensis gruppe"     | ssp. <i>sikkimensis</i>  | ssp. <i>alpherakyi</i>  | Hap 16           | Hap 24                  |
|            | Qinghai prov., Guide, Qunfia Pass, 3500 m                             | 76 (D)                 | 2018 | 1 | "sikkimensis gruppe"     | ssp. <i>sikkimensis</i>  | ssp. <i>alpherakyi</i>  | Hap 15           | Hap 24                  |
|            | Qinghai prov., Hualong country, 20 km E of Zhaba town, 2500-3000 mts. | 75 (D)                 | 2017 | 1 | "sikkimensis gruppe"     | ssp. <i>chinensis</i>    | ssp. <i>venchuanus</i>  | Hap 1            | Hap 2                   |
| Croatia    | Qinghai prov., Yushu area, Zadoi county, 4000 mts.                    | 82 (D)                 | 2017 | 1 | "sikkimensis gruppe"     | ssp. <i>sikkimensis</i>  | ssp. <i>alpherakyi</i>  | Hap 19           | Hap 27                  |
|            | Istria, Novigrad                                                      | 43 (D), 44 (D)         | 2000 | 2 | ssp. <i>giganteus</i>    | ssp. <i>emisphyrus</i>   | ssp. <i>machaon</i>     | Hap 1            | Hap 4                   |
|            | Hvar Is. Hvar City                                                    | 34 (D)                 | 1998 | 1 | ssp. <i>giganteus</i>    | ssp. <i>emisphyrus</i>   | ssp. <i>machaon</i>     | Hap 1            | Hap 9                   |
|            | Omisi                                                                 | 33 (D)                 | 1999 | 1 | ssp. <i>giganteus</i>    | ssp. <i>emisphyrus</i>   | ssp. <i>machaon</i>     | Hap 1            | Hap 3                   |
|            | Tucepi, Makarska                                                      | 4 (D), 5 (D)           | 2001 | 2 | ssp. <i>giganteus</i>    | ssp. <i>emisphyrus</i>   | ssp. <i>machaon</i>     | Hap 1            | Hap 2<br>Hap 4          |
| Czech Rep. | Pardubice                                                             | 38 (F), 39 (F), 40 (F) | 2014 | 3 | ssp. <i>gorganus</i>     | ssp. <i>gorganus</i>     | ssp. <i>machaon</i>     | Hap 1<br>Hap 9   | Hap 5                   |
| Finland    | Rovaniemi Reg., Near Tapionkyla                                       | 84 (D)                 | 2014 | 1 | ssp. <i>lapponicus</i>   | ssp. <i>machaon</i>      | ssp. <i>machaon</i>     | Hap 1            | Hap 29                  |
| France     | Vif (Isère), Auvergne-Rhône-Alpes                                     | 30 (F), 31 (F), 32 (F) | 2015 | 3 | ssp. <i>alpicus</i>      | ssp. <i>alpicae</i>      | ssp. <i>machaon</i>     | Hap 1            | Hap 3<br>Hap 4<br>Hap 5 |
| Germany    | Fiderstadt, Stuttgart                                                 | 52 (D)                 | 2011 | 1 | ssp. <i>gorganus</i>     | ssp. <i>gorganus</i>     | ssp. <i>machaon</i>     | Hap 1            | Hap 13                  |
| Greece     | Despotis                                                              | 41 (D)                 | 2012 | 1 | ssp. <i>giganteus</i>    | ssp. <i>emisphyrus</i>   | ssp. <i>machaon</i>     | Hap 11           | Hap 10                  |
|            | Karitsa                                                               | 49 (F)                 | 2015 | 1 | ssp. <i>emisphyrus</i>   | ssp. <i>emisphyrus</i>   | ssp. <i>machaon</i>     | Hap 1            | Hap 2                   |
| India      | Himachal Pradesh, Kullu Tehsil, Pulga, 2400 mts.                      | 70 (D)                 | 1999 | 1 | ssp. <i>pendjabensis</i> | ssp. <i>pendjabensis</i> | ssp. <i>asiatica</i>    | Hap 14           | Hap 22                  |
| Italy      | Elba Is., Lacona – Monte Grosso                                       | 69 (D)                 | 2013 | 1 | ssp. <i>emisphyrus</i>   | ssp. <i>emisphyrus</i>   | ssp. <i>machaon</i>     | Hap 1            | Hap 3                   |
|            | Provincia di Lecco, Regione Lombardia, Civate                         | 11 (F)                 | 2014 | 1 | ssp. <i>emisphyrus</i>   | ssp. <i>emisphyrus</i>   | ssp. <i>machaon</i>     | Hap 1            | Hap 7                   |
|            | Sicilia Is. Prov. Palermo, Bosco Della Fieuzza, Fieuzza env.          | 42 (D)                 | 2016 | 1 | ssp. <i>sphyrus</i>      | ssp. <i>sphyrus</i>      | ssp. <i>machaon</i>     | Hap 1            | Hap 11                  |
| Japan      | Kanagawa pref., Yokohama city                                         | 57 (D), 58 (D)         | 2016 | 2 | ssp. <i>hippocrates</i>  | <i>P. hippocrates</i>    | ssp. <i>hippocrates</i> | Hap 1            | Hap 17                  |
| Lithuania  | Varena reg. Kasetos vill.                                             | 88 (F)                 | 2018 | 1 | ssp. <i>machaon</i>      | ssp. <i>machaon</i>      | ssp. <i>machaon</i>     | Hap 1            | Hap 32                  |
| Macedonia  | Gevgelia env.                                                         | 1 (D), 3 (D)           | 2014 | 2 | ssp. <i>giganteus</i>    | ssp. <i>emisphyrus</i>   | ssp. <i>machaon</i>     | Hap 1            | Hap 2<br>Hap 3          |
| Malta      | Rabbat                                                                | 74 (D)                 | 1999 | 1 | ssp. <i>melitensis</i>   | ssp. <i>sphyrus</i>      | ssp. <i>melitensis</i>  | Hap 1            | Hap 7                   |

|                |                                                                           |                                        |      |   |                           |                           |                           |                |                         |
|----------------|---------------------------------------------------------------------------|----------------------------------------|------|---|---------------------------|---------------------------|---------------------------|----------------|-------------------------|
| Morocco        | Rif occidental, Forêt de Chouihat, S djebel Tisouka, N Chefchaouen        | 12 (D), 87 (D)                         | 2014 | 2 | <i>ssp. mauretanicus</i>  | <i>ssp. mauretanicus</i>  | <i>ssp. mauretanicus</i>  | Hap 4<br>Hap 5 | Hap 1                   |
|                | Haut Atlas central, Imi-n-Ifri, Demnate, assif Tissilt                    | 13 (D)                                 | 2014 | 1 | <i>ssp. mauretanicus</i>  | <i>ssp. mauretanicus</i>  | <i>ssp. mauretanicus</i>  | Hap 5          | Hap 1                   |
| Poland         | Kraków-Częstochowa Upland: Olsztyn                                        | 17 (F), 18(F), 19 (F)                  | 2014 | 3 | <i>ssp. gorganus</i>      | <i>ssp. gorganus</i>      | <i>ssp. machaon</i>       | Hap 1          | Hap 4<br>Hap 5          |
|                | Małopolska Upland: Łódź                                                   | 37 (F)                                 | 2015 | 1 | <i>ssp. gorganus</i>      | <i>ssp. gorganus</i>      | <i>ssp. machaon</i>       | Hap 8          | Hap 4                   |
|                | Pomeranian Lakeland: Połczyn-Zdrój                                        | 50 (F)                                 | 2015 | 1 | <i>ssp. gorganus</i>      | <i>ssp. gorganus</i>      | <i>ssp. machaon</i>       | Hap 1          | Hap 5                   |
|                | Sandomierska Lowland: Leżajsk                                             | 46 (F), 47 (F), 48 (F)                 | 2016 | 3 | <i>ssp. gorganus</i>      | <i>ssp. gorganus</i>      | <i>ssp. machaon</i>       | Hap 1          | Hap 3                   |
|                | Upper Silesia: Imielin                                                    | 35 (F)                                 | 2015 | 1 | <i>ssp. gorganus</i>      | <i>ssp. gorganus</i>      | <i>ssp. machaon</i>       | Hap 8          | Hap 5                   |
|                | Upper Silesia: Lubliniec                                                  | 14 (F)                                 | 2014 | 1 | <i>ssp. gorganus</i>      | <i>ssp. gorganus</i>      | <i>ssp. machaon</i>       | Hap 1          | Hap 4                   |
|                | Upper Silesia: Olesno                                                     | 45 (F)                                 | 2016 | 1 | <i>ssp. gorganus</i>      | <i>ssp. gorganus</i>      | <i>ssp. machaon</i>       | Hap 1          | Hap 5                   |
|                | Upper Silesia: Szklarnia near Lubliniec                                   | 15 (F)                                 | 2014 | 1 | <i>ssp. gorganus</i>      | <i>ssp. gorganus</i>      | <i>ssp. machaon</i>       | Hap 6          | Hap 2                   |
|                | Wielkopolsko-Kujawska Lowland: Czempin                                    | 64 (F)                                 | 2017 | 1 | <i>ssp. gorganus</i>      | <i>ssp. gorganus</i>      | <i>ssp. machaon</i>       | Hap 1          | Hap 2                   |
|                | Wielkopolsko-Kujawska Lowland: Poznań                                     | 63 (F)                                 | 2017 | 1 | <i>ssp. gorganus</i>      | <i>ssp. gorganus</i>      | <i>ssp. machaon</i>       | Hap 1          | Hap 4                   |
| Romania        | Clui Napoca                                                               | 36 (F)                                 | 2014 | 1 | <i>ssp. gorganus</i>      | <i>ssp. vargaianus</i>    | <i>ssp. machaon</i>       | Hap 8          | Hap 4                   |
| Russia         | Altai, Katun riv., Chermal vill., 430 mts.                                | 61 (D)                                 | 2016 | 1 | <i>ssp. oreinus</i>       | <i>ssp. oreinus</i>       | <i>ssp. centralis</i>     | Hap 1          | Hap 20                  |
|                | Altai mts., Ongudai distr., Cheki-Taman pass., 1250 mts.                  | 59 (D)                                 | 2015 | 1 | <i>ssp. oreinus</i>       | <i>ssp. oreinus</i>       | <i>ssp. centralis</i>     | Hap 1          | Hap 18                  |
|                | Caucasus mts., Sochi reg                                                  | 62 (D)                                 | 2015 | 1 | <i>ssp. syriacus</i>      | <i>ssp. syriacus</i>      | <i>ssp. machaon</i>       | Hap 1          | Hap 5                   |
|                | Kamchatka Peninsula, Esso vill.                                           | 90 (D)                                 | 2014 | 1 | <i>ssp. kamtschadalus</i> | <i>ssp. kamtschadalus</i> | <i>ssp. kamtschadalus</i> | Hap 22         | Hap 33                  |
|                | North Ural, Kvarush Mr. Range                                             | 73 (D)                                 | 2014 | 1 | <i>ssp. machaon ?</i>     | <i>ssp. machaon</i>       | <i>ssp. machaon</i>       | Hap 1          | Hap 3                   |
|                | Primorski kraj, Anuchinsky distr., Novogorodevka vill.                    | 25 (D)                                 | 2015 | 1 | <i>ssp. amurensis</i>     | <i>ssp. ussuriensis</i>   | <i>ssp. ussuriensis</i>   | Hap 1          | Hap 4                   |
|                | Sakhalin Is., Cape Kril'on, Malikna vill.,                                | 55 (D), 56 (D)                         | 2012 | 2 | <i>ssp. sachalinensis</i> | <i>ssp. sachalinensis</i> | <i>ssp. sachalinensis</i> | Hap 13         | Hap 15<br>Hap 16        |
|                | Voronezh distr.                                                           | 20 (D), 21 (D), 22 (D), 23 (D), 24 (D) | 2014 | 5 | <i>ssp. gorganus ?</i>    | <i>ssp. gorganus</i>      | <i>ssp. machaon</i>       | Hap 1<br>Hap 7 | Hap 5                   |
| Portugal       | Aveiro                                                                    | 72 (D)                                 | 2011 | 1 | <i>ssp. hispanicus</i>    | <i>ssp. emisphyrus</i>    | <i>ssp. machaon</i>       | Hap 1          | Hap 23                  |
| South Korea    | Andong, Gyeongsangbuk-Do                                                  | 10 (D)                                 | 2014 | 1 | ?                         | <i>P. hippocrates</i>     | <i>ssp. hippocrates</i>   | Hap 1          | Hap 6                   |
| Spain          | Granada, La Cruz                                                          | 26 (F), 27 (F), 28 (F), 29 (F)         | 2015 | 4 | <i>ssp. hispanicus</i>    | <i>ssp. emisphyrus</i>    | <i>ssp. machaon</i>       | Hap 1          | Hap 2<br>Hap 3<br>Hap 4 |
|                | Torremolinos                                                              | 51 (D)                                 | 2015 | 1 | <i>ssp. hispanicus</i>    | <i>ssp. emisphyrus</i>    | <i>ssp. machaon</i>       | Hap 1          | Hap 12                  |
| Tajikistan     | Darvaz mts., Kugireiu range, Kalaishum city env., near Afghanistan border | 53 (D), 54 (D)                         | 2015 | 2 | <i>ssp. chitralensis</i>  | <i>ssp. ladakensis</i>    | <i>ssp. centralis</i>     | Hap 12         | Hap 14                  |
| Ukraine        | Crimea Peninsula, Kerch Peninsula, Lovovo vill.                           | 65 (D), 66 (D)                         | 2015 | 2 | <i>ssp. gorganus ?</i>    | <i>ssp. gorganus</i>      | <i>ssp. machaon</i>       | Hap 1          | Hap 4<br>Hap 21         |
| United Kingdom | Monk's Wood, Combr. Shira                                                 | 71 (D)                                 | 1990 | 1 | <i>ssp. britannicus</i>   | <i>ssp. britannicus</i>   | <i>ssp. britannicus</i>   | Hap 1          | Hap 7                   |
|                | Norfolk, Barton Broad                                                     | 78 (D)                                 | 1981 | 1 | <i>ssp. britannicus</i>   | <i>ssp. britannicus</i>   | <i>ssp. britannicus</i>   | Hap 17         | Hap 25                  |
| Uzbekistan     | Altai mts., Zeravshan ridge, Samarkand distr., Urgut, 2400 mts.           | 60 (D)                                 | 2014 | 1 | <i>ssp. centralis</i>     | <i>ssp. centralis</i>     | <i>ssp. centralis</i>     | Hap 12         | Hap 19                  |

F – fresh specimen; D – dry specimen; Seyer\*: (see References)

References:

1. Eller, K. Die Rassen von *Papilio machaon* L.; E.J. Brill: Leiden, **1936**; 96 p.
2. Seyer, H. Versuch einer revision der *Papilio machaon*-subspezies in der westlichen Paläarktis. Mitteilungen der Entomologischen Gesellschaft Basel **1974**, 24(2), 64-90.
3. Seyer, H. Versuch einer revision der *Papilio machaon*-subspezies in der ostlichen Paläarktis. Mitteilungen der Entomologischen Gesellschaft Basel **1976**, 26(3), 65-87.
4. Seyer, H. Versuch einer revision der *Papilio machaon*-subspezies in der ostlichen Paläarktis. Mitteilungen der Entomologischen Gesellschaft Basel **1976**, 26(4), 97-145.
5. Sturm, R. Butterflies of the World, Part 45: Papilionidae XVI: Illustrated Checklist of *Papilio machaon* - group, *Iphiclidides po-dalirius*, and *Papilio alexanor*. Goecke & Evers Verlag, **2017**; 45 p.
